# Supplementary material for: Adjusting for genetic confounders in transcriptome-wide association studies improves discovery of risk genes of complex traits
Source: Springer Nature journal article supplement (doi:10.1038/s41588-023-01648-9), 2024-01-26
Supplement: 41588_2023_1648_MOESM2_ESM.pdf [file 41588_2023_1648_MOESM2_ESM.pdf]

## Reporting Summary

Nature Portfolio wishes to improve the reproducibility of the work that we publish. This form provides structure for consistency and transparency in reporting. For further information on Nature Portfolio policies, see our [Editorial Policies](#) and the [Editorial Policy Checklist](#).

### Statistics

For all statistical analyses, confirm that the following items are present in the figure legend, table legend, main text, or Methods section.

n/a Confirmed

- The exact sample size ( $n$ ) for each experimental group/condition, given as a discrete number and unit of measurement
- A statement on whether measurements were taken from distinct samples or whether the same sample was measured repeatedly
- The statistical test(s) used AND whether they are one- or two-sided  
*Only common tests should be described solely by name; describe more complex techniques in the Methods section.*
- A description of all covariates tested
- A description of any assumptions or corrections, such as tests of normality and adjustment for multiple comparisons
- A full description of the statistical parameters including central tendency (e.g. means) or other basic estimates (e.g. regression coefficient) AND variation (e.g. standard deviation) or associated estimates of uncertainty (e.g. confidence intervals)
- For null hypothesis testing, the test statistic (e.g.  $F$ ,  $t$ ,  $r$ ) with confidence intervals, effect sizes, degrees of freedom and  $P$  value noted  
*Give  $P$  values as exact values whenever suitable.*
- For Bayesian analysis, information on the choice of priors and Markov chain Monte Carlo settings
- For hierarchical and complex designs, identification of the appropriate level for tests and full reporting of outcomes
- Estimates of effect sizes (e.g. Cohen's  $d$ , Pearson's  $r$ ), indicating how they were calculated

*Our web collection on [statistics for biologists](#) contains articles on many of the points above.*

### Software and code

Policy information about [availability of computer code](#)

Data collection

Data analysis

For manuscripts utilizing custom algorithms or software that are central to the research but not yet described in published literature, software must be made available to editors and reviewers. We strongly encourage code deposition in a community repository (e.g. GitHub). See the Nature Portfolio [guidelines for submitting code & software](#) for further information.

### Data

Policy information about [availability of data](#)

All manuscripts must include a [data availability statement](#). This statement should provide the following information, where applicable:

- Accession codes, unique identifiers, or web links for publicly available datasets
- A description of any restrictions on data availability
- For clinical datasets or third party data, please ensure that the statement adheres to our [policy](#)

tissue dataset gene prediction models, <http://gusevlab.org/projects/fusion/>. Publically available summary statistics for LDL, SBP, and IBD were obtained from the IEU OpenGWAS project (<https://gwas.mrcieu.ac.uk/>) using GWAS IDs “ukb-d-30780\_irtnt” (LDL), “ukb-a-360” (SBP), and “ebi-a-GCST004131” (IBD). Publically available summary statistics for SCZ from the Psychiatric Genetics Consortium and the CardiffCOGS study were obtained from the authors via the link provided in the manuscript (<https://doi.org/10.1038/s41588-018-0059-2>): <http://walters.psychm.cf.ac.uk/> Publicly available prediction models for 49 GTEx tissues from PredictDB: <https://predictdb.org/post/2021/07/21/gtex-v8-models-on-eqtl-and-sqtl/>.

## Human research participants

Policy information about [studies involving human research participants and Sex and Gender in Research](#).

|                             |                                                                                         |
|-----------------------------|-----------------------------------------------------------------------------------------|
| Reporting on sex and gender | <input type="text" value="The study used publicly available GWAS summary statistics."/> |
| Population characteristics  | <input type="text" value="NA"/>                                                         |
| Recruitment                 | <input type="text" value="NA"/>                                                         |
| Ethics oversight            | <input type="text" value="NA"/>                                                         |

Note that full information on the approval of the study protocol must also be provided in the manuscript.

## Field-specific reporting

Please select the one below that is the best fit for your research. If you are not sure, read the appropriate sections before making your selection.

Life sciences       Behavioural & social sciences       Ecological, evolutionary & environmental sciences

For a reference copy of the document with all sections, see [nature.com/documents/nr-reporting-summary-flat.pdf](https://nature.com/documents/nr-reporting-summary-flat.pdf)

## Life sciences study design

All studies must disclose on these points even when the disclosure is negative.

|                 |                                                                                                                                                                                                                                                                                                                                                                                                                                                                                                                                                                                     |
|-----------------|-------------------------------------------------------------------------------------------------------------------------------------------------------------------------------------------------------------------------------------------------------------------------------------------------------------------------------------------------------------------------------------------------------------------------------------------------------------------------------------------------------------------------------------------------------------------------------------|
| Sample size     | <input type="text" value="Sample size is provided with each analysis performed in the manuscript. We chose a few sample sizes for simulation studies to match current typical GWAS cohort sizes. For real data application, we used published GWAS summary statistics."/>                                                                                                                                                                                                                                                                                                           |
| Data exclusions | <input type="text" value="In simulations, we filtered samples to only keep 'White British', removed samples with missing information, mismatches between self-reported and genetic sex, or 'outliers' as defined by UK Biobank. We also removed any individuals that have close relatives in the cohort."/>                                                                                                                                                                                                                                                                         |
| Replication     | <input type="text" value="All results are reproducible."/>                                                                                                                                                                                                                                                                                                                                                                                                                                                                                                                          |
| Randomization   | <input type="text" value="In simulation studies, we used genotype data from UK biobank by randomly selecting 80,000 samples. We then filtered samples to only keep 'White British', removed samples with missing information, mismatches between self-reported and genetic sex, or 'outliers' as defined by UK Biobank. We also removed any individuals that have close relatives in the cohort. This ended up with a cohort of n = 45,087 samples. In real data application, To ease computation, we randomly selected 10% of these samples to serve as the LD reference panel."/> |
| Blinding        | <input type="text" value="The individuals are blind to investigators."/>                                                                                                                                                                                                                                                                                                                                                                                                                                                                                                            |

## Reporting for specific materials, systems and methods

We require information from authors about some types of materials, experimental systems and methods used in many studies. Here, indicate whether each material, system or method listed is relevant to your study. If you are not sure if a list item applies to your research, read the appropriate section before selecting a response.

### Materials & experimental systems

| n/a                                 | Involved in the study                                  |
|-------------------------------------|--------------------------------------------------------|
| <input checked="" type="checkbox"/> | <input type="checkbox"/> Antibodies                    |
| <input checked="" type="checkbox"/> | <input type="checkbox"/> Eukaryotic cell lines         |
| <input checked="" type="checkbox"/> | <input type="checkbox"/> Palaeontology and archaeology |
| <input checked="" type="checkbox"/> | <input type="checkbox"/> Animals and other organisms   |
| <input checked="" type="checkbox"/> | <input type="checkbox"/> Clinical data                 |
| <input checked="" type="checkbox"/> | <input type="checkbox"/> Dual use research of concern  |

### Methods

| n/a                                 | Involved in the study                           |
|-------------------------------------|-------------------------------------------------|
| <input checked="" type="checkbox"/> | <input type="checkbox"/> ChIP-seq               |
| <input checked="" type="checkbox"/> | <input type="checkbox"/> Flow cytometry         |
| <input checked="" type="checkbox"/> | <input type="checkbox"/> MRI-based neuroimaging |
